# Supplementary material for: Phase I Clinical Trial of the Wee1 Inhibitor Adavosertib (AZD1775) with Irinotecan in Children with Relapsed Solid Tumors: A COG Phase I Consortium Report (ADVL1312)
Source: Oxford University Press journal article supplement (doi:10.1158/1078-0432.ccr-19-3470), 2019-12-19
Supplement: 10780432ccr193470-sup-231188_1_supp_5930787_q1pmcc.docx [file 10780432ccr193470-sup-231188_1_supp_5930787_q1pmcc.docx]

Supplementary Tables: Pediatric phase 1 trial of adavosertib (AZD1775) and irinotecan

Table S1. Patient Characteristics of eligible (n=37) and MTD/RP2D evaluable (n=27) patients

| **Characteristic** | **Number (%) (n=37)** | **Number (%) (n=27)** |
| --- | --- | --- |
| Age (years)  Median  Range | 13.2  2 - 20 | 14  2 - 20 |
| Sex  Male  Female | 21 (57)  16 (43) | 14 (52)  13 (48) |
| Race  White  Asian  American Indian or Alaska Native  Native Hawaiian or other Pacific Islander  Black or African American  Unknown | 26 (70)  3 (8)  1 (3)  1 (3)  3 (8)  3 (8) | 19 (70)  2 (7)  (3)  (3)  3 (11)  3 (11) |
| Ethnicity |  |  |
| Non-Hispanic  Hispanic  Unknown | 33 (89)  4 (11)  0 (0) | 24 (89)  3 (11)  0 (0) |
| Prior Therapy |  |  |
| Chemotherapy Regimens  Median  Range | (n=35)  3  1 - 11 | (n=25)  3  1 - 11 |
| Radiation Therapy  Median  Range | (n=30)  1  1 - 3 | (n=21)  1  1 - 3 |

**Table S1B.** Diagnosis of eligible (n=37) and MTD/RP2D evaluable (n=27) patients

| **Diagnosis** | **Number (%) (n=37)** | **Number (%) (n=27)** |
| --- | --- | --- |
| Carcinoma | 4 (10.8) | 4 (14.8) |
| Ependymoma | 5 (13.5) | 4 (14.8) |
| Ewing sarcoma | 4 (10.8) | 4 (14.8) |
| Malignant glioma | 11 (29.7) | 7 (25.9) |
| Medulloblastoma | 2 (5.4) |  |
| Neuroblastoma | 2 (5.4) | 2 (7.4) |
| Osteosarcoma | 3 (8.1) | 3 (11.1) |
| Soft tissue sarcoma | 5 (13.5) | 2 (7.4) |
| Wilms tumor | 1 (2.7) | 1 (3.7) |

**Table S2.** In Cycle 1, All Hematologic and Non-Hematologic toxicities related to protocol therapy in evaluable patients (N=27)

| Table S2. Most Common (>=10% in Non-Hematologic) Toxicities Summary (maximum grade), In Cycle 1. | | | | | | | | | | | | |
| --- | --- | --- | --- | --- | --- | --- | --- | --- | --- | --- | --- | --- |
|  | Dose Level and Toxicity Grade, No. (%) | | | | | | | | | | | |
|  | All Dose Level (N=27) | | 1 (n=3) | | 2 (n=3) | | 3 (n=3) | | 4 (n=12) | | 5 (n=6) | |
| Toxicity Type | All | >=Grade 3 | All | >=Grade 3 | All | >=Grade 3 | All | >=Grade 3 | All | >=Grade 3 | All | >=Grade 3 |
| Diarrhea | 24 (89) | 3 (11) | 3 (100) | 1 (33) | 3 (100) | 0 (0) | 3 (100) | 0 (0) | 9 (75) | 0 (0) | 6 (100) | 2 (33) |
| Lymphocyte count decreased | 18 (67) | 6 (22) | 2 (67) | 0 (0) | 1 (33) | 0 (0) | 3 (100) | 1 (33) | 9 (75) | 5 (42) | 3 (50) | 0 (0) |
| Anemia | 15 (56) | 1 (4) | 1 (33) | 0 (0) | 1 (33) | 0 (0) | 2 (67) | 0 (0) | 8 (67) | 1 (8) | 3 (50) | 0 (0) |
| Vomiting | 13 (48) | 1 (4) | 1 (33) | 0 (0) | 2 (67) | 0 (0) | 2 (67) | 0 (0) | 4 (33) | 0 (0) | 4 (67) | 1 (17) |
| Nausea | 12 (44) | 1 (4) | 1 (33) | 0 (0) | 2 (67) | 0 (0) | 2 (67) | 0 (0) | 4 (33) | 0 (0) | 3 (50) | 1 (17) |
| White blood cell decreased | 12 (44) | 3 (11) | 2 (67) | 0 (0) | 0 (0) | 0 (0) | 2 (67) | 1 (33) | 5 (42) | 2 (17) | 3 (50) | 0 (0) |
| Platelet count decreased | 11 (41) | 0 (0) | 2 (67) | 0 (0) | 1 (33) | 0 (0) | 1 (33) | 0 (0) | 4 (33) | 0 (0) | 3 (50) | 0 (0) |
| Abdominal pain | 10 (37) | 0 (0) | 2 (67) | 0 (0) | 1 (33) | 0 (0) | 1 (33) | 0 (0) | 2 (17) | 0 (0) | 4 (67) | 0 (0) |
| Neutrophil count decreased | 9 (33) | 6 (22) | 0 (0) | 0 (0) | 0 (0) | 0 (0) | 2 (67) | 2 (67) | 5 (42) | 2 (17) | 2 (33) | 2 (33) |
| Anorexia | 8 (30) | 0 (0) | 1 (33) | 0 (0) | 0 (0) | 0 (0) | 0 (0) | 0 (0) | 5 (42) | 0 (0) | 2 (33) | 0 (0) |
| Hypophosphatemia | 7 (26) | 1 (4) | 0 (0) | 0 (0) | 2 (67) | 0 (0) | 0 (0) | 0 (0) | 4 (33) | 0 (0) | 1 (17) | 1 (17) |
| Hypokalemia | 6 (22) | 2 (7) | 0 (0) | 0 (0) | 0 (0) | 0 (0) | 0 (0) | 0 (0) | 3 (25) | 1 (8) | 3 (50) | 1 (17) |
| Alanine aminotransferase increased | 5 (19) | 0 (0) | 1 (33) | 0 (0) | 0 (0) | 0 (0) | 0 (0) | 0 (0) | 3 (25) | 0 (0) | 1 (17) | 0 (0) |
| Alopecia | 5 (19) | 0 (0) | 0 (0) | 0 (0) | 0 (0) | 0 (0) | 2 (67) | 0 (0) | 1 (8) | 0 (0) | 2 (33) | 0 (0) |
| Fatigue | 5 (19) | 0 (0) | 0 (0) | 0 (0) | 0 (0) | 0 (0) | 1 (33) | 0 (0) | 3 (25) | 0 (0) | 1 (17) | 0 (0) |
| Hypoalbuminemia | 5 (19) | 0 (0) | 0 (0) | 0 (0) | 0 (0) | 0 (0) | 2 (67) | 0 (0) | 2 (17) | 0 (0) | 1 (17) | 0 (0) |
| Hypomagnesemia | 4 (15) | 0 (0) | 0 (0) | 0 (0) | 0 (0) | 0 (0) | 0 (0) | 0 (0) | 2 (17) | 0 (0) | 2 (33) | 0 (0) |
| Aspartate aminotransferase increased | 3 (11) | 0 (0) | 1 (33) | 0 (0) | 0 (0) | 0 (0) | 0 (0) | 0 (0) | 2 (17) | 0 (0) | 0 (0) | 0 (0) |
| Blood bilirubin increased | 3 (11) | 0 (0) | 0 (0) | 0 (0) | 0 (0) | 0 (0) | 1 (33) | 0 (0) | 2 (17) | 0 (0) | 0 (0) | 0 (0) |
| Creatinine increased | 3 (11) | 0 (0) | 0 (0) | 0 (0) | 0 (0) | 0 (0) | 1 (33) | 0 (0) | 2 (17) | 0 (0) | 0 (0) | 0 (0) |
| Hypocalcemia | 3 (11) | 0 (0) | 0 (0) | 0 (0) | 0 (0) | 0 (0) | 0 (0) | 0 (0) | 1 (8) | 0 (0) | 2 (33) | 0 (0) |
| Hyponatremia | 3 (11) | 0 (0) | 0 (0) | 0 (0) | 0 (0) | 0 (0) | 1 (33) | 0 (0) | 1 (8) | 0 (0) | 1 (17) | 0 (0) |
| Malaise | 3 (11) | 0 (0) | 0 (0) | 0 (0) | 1 (33) | 0 (0) | 0 (0) | 0 (0) | 0 (0) | 0 (0) | 2 (33) | 0 (0) |
| Weight loss | 3 (11) | 0 (0) | 0 (0) | 0 (0) | 0 (0) | 0 (0) | 1 (33) | 0 (0) | 1 (8) | 0 (0) | 1 (17) | 0 (0) |
| Headache | 2 (7) | 0 (0) | 0 (0) | 0 (0) | 1 (33) | 0 (0) | 0 (0) | 0 (0) | 0 (0) | 0 (0) | 1 (17) | 0 (0) |
| Hyperglycemia | 2 (7) | 0 (0) | 0 (0) | 0 (0) | 0 (0) | 0 (0) | 0 (0) | 0 (0) | 1 (8) | 0 (0) | 1 (17) | 0 (0) |
| Investigations - Other, ELEVATED BUN | 2 (7) | 0 (0) | 0 (0) | 0 (0) | 1 (33) | 0 (0) | 0 (0) | 0 (0) | 0 (0) | 0 (0) | 1 (17) | 0 (0) |
| Alkaline phosphatase increased | 1 (4) | 0 (0) | 0 (0) | 0 (0) | 0 (0) | 0 (0) | 0 (0) | 0 (0) | 0 (0) | 0 (0) | 1 (17) | 0 (0) |
| Blurred vision | 1 (4) | 0 (0) | 0 (0) | 0 (0) | 0 (0) | 0 (0) | 0 (0) | 0 (0) | 1 (8) | 0 (0) | 0 (0) | 0 (0) |
| Constipation | 1 (4) | 0 (0) | 0 (0) | 0 (0) | 0 (0) | 0 (0) | 0 (0) | 0 (0) | 1 (8) | 0 (0) | 0 (0) | 0 (0) |
| Dizziness | 1 (4) | 0 (0) | 0 (0) | 0 (0) | 0 (0) | 0 (0) | 0 (0) | 0 (0) | 0 (0) | 0 (0) | 1 (17) | 0 (0) |
| Hypermagnesemia | 1 (4) | 0 (0) | 0 (0) | 0 (0) | 1 (33) | 0 (0) | 0 (0) | 0 (0) | 0 (0) | 0 (0) | 0 (0) | 0 (0) |
| Hypertension | 1 (4) | 0 (0) | 0 (0) | 0 (0) | 0 (0) | 0 (0) | 0 (0) | 0 (0) | 1 (8) | 0 (0) | 0 (0) | 0 (0) |
| Hypotension | 1 (4) | 1 (4) | 0 (0) | 0 (0) | 0 (0) | 0 (0) | 0 (0) | 0 (0) | 0 (0) | 0 (0) | 1 (17) | 1 (17) |
| Investigations - Other, HYPOCHLOREMIA | 1 (4) | 0 (0) | 0 (0) | 0 (0) | 1 (33) | 0 (0) | 0 (0) | 0 (0) | 0 (0) | 0 (0) | 0 (0) | 0 (0) |
| Pain in extremity | 1 (4) | 0 (0) | 0 (0) | 0 (0) | 0 (0) | 0 (0) | 0 (0) | 0 (0) | 1 (8) | 0 (0) | 0 (0) | 0 (0) |
| Peripheral sensory neuropathy | 1 (4) | 0 (0) | 0 (0) | 0 (0) | 0 (0) | 0 (0) | 1 (33) | 0 (0) | 0 (0) | 0 (0) | 0 (0) | 0 (0) |
| Rash acneiform | 1 (4) | 0 (0) | 0 (0) | 0 (0) | 0 (0) | 0 (0) | 0 (0) | 0 (0) | 1 (8) | 0 (0) | 0 (0) | 0 (0) |
| Rash maculo-papular | 1 (4) | 0 (0) | 0 (0) | 0 (0) | 0 (0) | 0 (0) | 0 (0) | 0 (0) | 1 (8) | 0 (0) | 0 (0) | 0 (0) |
| Sinus tachycardia | 1 (4) | 0 (0) | 0 (0) | 0 (0) | 1 (33) | 0 (0) | 0 (0) | 0 (0) | 0 (0) | 0 (0) | 0 (0) | 0 (0) |

**Note:** Alltoxicities were attributed only for DEFINITE, POSSIBLE and PROBABLE. Most common (>10%) toxicities were included only.
